# Supplementary material for: In silico analysis identified miRNA-based therapeutic agents against glioblastoma multiforme
Source: PubMed Central journal article supplement — Oncol Rep. 2019 Feb 19;41(4):2194–208. doi: 10.3892/or.2019.7022 (PMC6412522; doi:10.3892/or.2019.7022), 2019-02-19
Supplement: Supplementary_Data.pdf [file Supplementary_Data.pdf]

Table SI. Main clinicopathological characteristics of samples from three gene chips.

| Data source | GEO accession      | Sample name        | Tumor grade  | Age    | Sex    |
|-------------|--------------------|--------------------|--------------|--------|--------|
| GSE25631    | GSM629768          | Human glioblastoma | WHO grade IV | 44     | Female |
|             | GSM629769          | Human glioblastoma | WHO grade IV | 22     | Female |
|             | GSM629770          | Human glioblastoma | WHO grade IV | 60     | Male   |
|             | GSM629771          | Human glioblastoma | WHO grade IV | 49     | Male   |
|             | GSM629772          | Human glioblastoma | WHO grade IV | 61     | Male   |
|             | GSM629773          | Human glioblastoma | WHO grade IV | 21     | Male   |
|             | GSM629774          | Human glioblastoma | WHO grade IV | 48     | Male   |
|             | GSM629775          | Human glioblastoma | WHO grade IV | 17     | Male   |
|             | GSM629776          | Human glioblastoma | WHO grade IV | 54     | Male   |
|             | GSM629777          | Human glioblastoma | WHO grade IV | 51     | Female |
|             | GSM629778          | Human glioblastoma | WHO grade IV | 60     | Male   |
|             | GSM629779          | Human glioblastoma | WHO grade IV | 54     | Male   |
|             | GSM629780          | Human glioblastoma | WHO grade IV | 52     | Male   |
|             | GSM629781          | Human glioblastoma | WHO grade IV | 36     | Female |
|             | GSM629782          | Human glioblastoma | WHO grade IV | 36     | Female |
|             | GSM629783          | Human glioblastoma | WHO grade IV | 17     | Male   |
|             | GSM629784          | Human glioblastoma | WHO grade IV | 60     | Male   |
|             | GSM629785          | Human glioblastoma | WHO grade IV | 57     | Female |
|             | GSM629786          | Human glioblastoma | WHO grade IV | 38     | Male   |
|             | GSM629787          | Human glioblastoma | WHO grade IV | 47     | Female |
|             | GSM629788          | Human glioblastoma | WHO grade IV | 51     | Male   |
|             | GSM629789          | Human glioblastoma | WHO grade IV | 49     | Male   |
|             | GSM629790          | Human glioblastoma | WHO grade IV | 40     | Male   |
|             | GSM629791          | Human glioblastoma | WHO grade IV | 65     | Male   |
|             | GSM629792          | Human glioblastoma | WHO grade IV | 68     | Female |
|             | GSM629793          | Human glioblastoma | WHO grade IV | 48     | Female |
|             | GSM629794          | Human glioblastoma | WHO grade IV | 12     | Male   |
|             | GSM629795          | Human glioblastoma | WHO grade IV | 37     | Male   |
|             | GSM629796          | Human glioblastoma | WHO grade IV | 51     | Male   |
|             | GSM629797          | Human glioblastoma | WHO grade IV | 32     | Male   |
|             | GSM629798          | Human glioblastoma | WHO grade IV | 54     | Male   |
|             | GSM629799          | Human glioblastoma | WHO grade IV | 55     | Male   |
|             | GSM629800          | Human glioblastoma | WHO grade IV | 63     | Male   |
|             | GSM629801          | Human glioblastoma | WHO grade IV | 43     | Female |
|             | GSM629802          | Human glioblastoma | WHO grade IV | 55     | Male   |
|             | GSM629803          | Human glioblastoma | WHO grade IV | 40     | Female |
|             | GSM629804          | Human glioblastoma | WHO grade IV | 37     | Male   |
|             | GSM629805          | Human glioblastoma | WHO grade IV | 59     | Male   |
|             | GSM629806          | Human glioblastoma | WHO grade IV | 55     | Female |
|             | GSM629807          | Human glioblastoma | WHO grade IV | 41     | Male   |
|             | GSM629808          | Human glioblastoma | WHO grade IV | 52     | Male   |
|             | GSM629809          | Human glioblastoma | WHO grade IV | 59     | Male   |
|             | GSM629810          | Human glioblastoma | WHO grade IV | 49     | Female |
|             | GSM629811          | Human glioblastoma | WHO grade IV | 44     | Female |
|             | GSM629812          | Human glioblastoma | WHO grade IV | 45     | Male   |
|             | GSM629813          | Human glioblastoma | WHO grade IV | 49     | Female |
|             | GSM629814          | Human glioblastoma | WHO grade IV | 54     | Male   |
|             | GSM629815          | Human glioblastoma | WHO grade IV | 52     | Male   |
|             | GSM629816          | Human glioblastoma | WHO grade IV | 42     | Male   |
|             | GSM629817          | Human glioblastoma | WHO grade IV | 45     | Female |
| GSM629818   | Human glioblastoma | WHO grade IV       | 57           | Male   |        |
| GSM629819   | Human glioblastoma | WHO grade IV       | 17           | Male   |        |
| GSM629820   | Human glioblastoma | WHO grade IV       | 53           | Male   |        |
| GSM629821   | Human glioblastoma | WHO grade IV       | 24           | Female |        |
| GSM629822   | Human glioblastoma | WHO grade IV       | 63           | Male   |        |
| GSM629823   | Human glioblastoma | WHO grade IV       | 56           | Male   |        |

Table SI. Continued.

| Data source | GEO accession | Sample name                | Tumor grade                          | Age | Sex    |
|-------------|---------------|----------------------------|--------------------------------------|-----|--------|
|             | GSM629824     | Human glioblastoma         | WHO grade IV                         | 48  | Male   |
|             | GSM629825     | Human glioblastoma         | WHO grade IV                         | 54  | Female |
|             | GSM629826     | Human glioblastoma         | WHO grade IV                         | 33  | Female |
|             | GSM629827     | Human glioblastoma         | WHO grade IV                         | 62  | Male   |
|             | GSM629828     | Human glioblastoma         | WHO grade IV                         | 70  | Female |
|             | GSM629829     | Human glioblastoma         | WHO grade IV                         | 61  | Male   |
|             | GSM629830     | Human glioblastoma         | WHO grade IV                         | 37  | Male   |
|             | GSM629831     | Human glioblastoma         | WHO grade IV                         | 39  | Female |
|             | GSM629832     | Human glioblastoma         | WHO grade IV                         | 22  | Female |
|             | GSM629833     | Human glioblastoma         | WHO grade IV                         | 33  | Male   |
|             | GSM629834     | Human glioblastoma         | WHO grade IV                         | 61  | Male   |
|             | GSM629835     | Human glioblastoma         | WHO grade IV                         | 34  | Male   |
|             | GSM629836     | Human glioblastoma         | WHO grade IV                         | 30  | Male   |
|             | GSM629837     | Human glioblastoma         | WHO grade IV                         | 35  | Female |
|             | GSM629838     | Human glioblastoma         | WHO grade IV                         | 39  | Female |
|             | GSM629839     | Human glioblastoma         | WHO grade IV                         | 61  | Female |
|             | GSM629840     | Human glioblastoma         | WHO grade IV                         | 36  | Male   |
|             | GSM629841     | Human glioblastoma         | WHO grade IV                         | 56  | Male   |
|             | GSM629842     | Human glioblastoma         | WHO grade IV                         | 59  | Male   |
|             | GSM629843     | Human glioblastoma         | WHO grade IV                         | 37  | Male   |
|             | GSM629844     | Human glioblastoma         | WHO grade IV                         | 28  | Female |
|             | GSM629845     | Human glioblastoma         | WHO grade IV                         | 32  | Female |
|             | GSM629846     | Human glioblastoma         | WHO grade IV                         | 46  | Male   |
|             | GSM629847     | Human glioblastoma         | WHO grade IV                         | 62  | Male   |
|             | GSM629848     | Human glioblastoma         | WHO grade IV                         | 45  | Female |
|             | GSM629849     | Human glioblastoma         | WHO grade IV                         | 47  | Male   |
|             | GSM629850     | Human normal brain         |                                      |     |        |
|             | GSM629851     | Human normal brain         |                                      |     |        |
|             | GSM629852     | Human normal brain         |                                      |     |        |
|             | GSM629853     | Human normal brain         |                                      |     |        |
|             | GSM629854     | Human normal brain         |                                      |     |        |
| GSE42651    | GSM1047488    | Glioblastoma               | WHO grade IV                         | 15  | Female |
|             | GSM1047489    | Glioblastoma               | WHO grade IV                         | 10  | Male   |
|             | GSM1047490    | Glioblastoma               | WHO grade IV                         | 4   | Female |
|             | GSM1047491    | Glioblastoma               | WHO grade IV                         | 10  | Female |
|             | GSM1047492    | Glioblastoma               | WHO grade IV                         | 7   | Female |
|             | GSM1047525    | Adult control cerebellum   |                                      | 22  | Male   |
|             | GSM1047526    | Adult control frontal lobe |                                      | 41  | Male   |
|             | GSM1047527    | Adult control cerebellum   |                                      | 21  | Male   |
|             | GSM1047528    | Adult control cerebellum   |                                      | 26  | Male   |
|             | GSM1047529    | Adult control frontal lobe |                                      | 82  | Male   |
|             | GSM1047530    | Adult control frontal lobe |                                      | 25  | Male   |
|             | GSM1047531    | Adult control frontal lobe |                                      | 27  | Male   |
| GSE61710    | GSM1511526    | Human malignant glioma     | WHO grade IV                         | 59  | Male   |
|             | GSM1511527    | Human normal brain         |                                      |     |        |
|             | GSM1511528    | Glioma peritumoral tissue  | Peritumoral area of<br>WHO grade III | 56  | Female |
|             | GSM1511529    | Malignant glioma tissue    | WHO grade IV                         | 56  | Female |
|             | GSM1511530    | Malignant glioma tissue    | WHO grade IV                         | 32  | Female |
|             | GSM1511531    | Malignant glioma tissue    | WHO grade IV                         | 54  | Female |
|             | GSM1511532    | Malignant glioma tissue    | WHO grade IV                         | 70  | Female |
|             | GSM1511533    | Glioma peritumoral tissue  | Peritumoral area of<br>WHO grade III | 30  | Male   |
|             | GSM1511534    | Glioma peritumoral tissue  | Peritumoral area of<br>WHO grade IV  | 70  | Male   |
|             | GSM1511537    | Malignant glioma tissue    | WHO grade IV                         | 60  | Male   |
|             | GSM1511538    | Malignant glioma tissue    | WHO grade IV                         | 57  | Male   |

Table SI. Continued.

| Data source | GEO accession | Sample name               | Tumor grade                          | Age | Sex  |
|-------------|---------------|---------------------------|--------------------------------------|-----|------|
|             | GSM1511539    | Malignant glioma tissue   | WHO grade IV                         | 58  | Male |
|             | GSM1511540    | Malignant glioma tissue   | WHO grade IV                         | 50  | Male |
|             | GSM1511541    | Glioma peritumoral tissue | Peritumoral area of<br>WHO grade III | 68  | Male |
|             | GSM1511542    | Malignant glioma tissue   | WHO grade IV                         | 53  | Male |

Table SII. Main clinical characteristics of samples used for immunohistochemistry by The Human Atlas.

| Protein | Cinical characteristics | Normal control | Tumor  |
|---------|-------------------------|----------------|--------|
| CDK6    | Patient ID              | 1,609          | 1,548  |
|         | Age                     | 62             | 75     |
|         | Sex                     | Male           | Male   |
| RB1     | Patient ID              | 1,582          | 3,090  |
|         | Age                     | 30             | 33     |
|         | Sex                     | Female         | Male   |
| NRAS    | Patient ID              | 3,739          | 3,091  |
|         | Age                     | 70             | 71     |
|         | Sex                     | Male           | Male   |
| PDGFRA  | Patient ID              | 1,582          | 3,326  |
|         | Age                     | 30             | 34     |
|         | Sex                     | Female         | Male   |
| CAMK2G  | Patient ID              | 3,739          | 122    |
|         | Age                     | 70             | 32     |
|         | Sex                     | Male           | Female |
| CAMK2B  | Patient ID              | 3,731          | 1,587  |
|         | Age                     | 37             | 36     |
|         | Sex                     | Male           | Female |
| PRKCB   | Patient ID              | 1,609          | 2,837  |
|         | Age                     | 62             | 58     |
|         | Sex                     | Male           | Male   |
| CALM3   | Patient ID              | 3,732          | 122    |
|         | Age                     | 64             | 32     |
|         | Sex                     | Female         | Female |

CDK6, cyclin-dependent kinase 6; RB1, retinoblastoma-associated protein; NRAS, GTPase NRas; PDGFRA, platelet-derived growth factor receptor alpha; CAMK2G, calcium/calmodulin-dependent protein kinase type II subunit gamma; CAMK2B, calcium/calmodulin-dependent protein kinase type II subunit beta; PRKCB, protein kinase C beta type; CALM3, calmodulin 3.
